# Supplementary material for: Treatment of Maternal Depression in a Medication Clinical Trial and Its Effect on Children
Source: Atypon-hosted journal article supplement (doi:10.1176/appi.ajp.2014.13121679), 2015-01-23
Supplement: appi.ajp.2014.13121679.ds001.pdf [file appi.ajp.2014.13121679.ds001.pdf]

 


Psychiatry Online
